# Supplementary material for: Compositional Changes in Hydroponically Cultivated Salicornia europaea at Different Growth Stages
Source: MDPI journal article supplement (doi:10.3390/plants12132472), 2023-06-28
Supplement: s1 [file s1]

# Compositional Changes in Hydroponically Cultivated *Salicornia europaea* at Different Growth Stages

Ariel E. Turcios <sup>1,†</sup>, Lukas Braem <sup>2,†</sup>, Camille Jonard <sup>2</sup>, Tom Lemans <sup>2</sup>, Iwona Cybulska <sup>2</sup>, Jutta Papenbrock <sup>1,\*</sup>

## Supplementary material

Table S1. Correlation analysis of the different growth parameters and organic compounds in *Salicornia europaea*

|                               | Week     | Ash      | Lignin   | Glucose  | Xylose   | Arabinose    | Insoluble_Compounds | Water_Extractives | Ethanol_Extractives | Volatile_Loss | Residues   | Protein  | Aboveground<br>Fresh<br>Biomass (g) | Aboveground<br>Dry Biomass<br>(g) | Water_Biomass<br>(%) |
|-------------------------------|----------|----------|----------|----------|----------|--------------|---------------------|-------------------|---------------------|---------------|------------|----------|-------------------------------------|-----------------------------------|----------------------|
| Week                          | 1        |          |          |          |          |              |                     |                   |                     |               |            |          |                                     |                                   |                      |
| Ash                           | -0.40098 | 1        |          |          |          |              |                     |                   |                     |               |            |          |                                     |                                   |                      |
| Lignin                        | 0.851591 | -0.14737 | 1        |          |          |              |                     |                   |                     |               |            |          |                                     |                                   |                      |
| Glucose                       | 0.835518 | -0.27713 | 0.757065 | 1        |          |              |                     |                   |                     |               |            |          |                                     |                                   |                      |
| Xylose                        | 0.791573 | -0.2018  | 0.714753 | 0.972595 | 1        |              |                     |                   |                     |               |            |          |                                     |                                   |                      |
| Arabinose                     | 0.308672 | -0.15112 | 0.106448 | 0.245973 | 0.414876 | 1            |                     |                   |                     |               |            |          |                                     |                                   |                      |
| Insoluble_Compounds           | 0.500288 | -0.704   | 0.258368 | 0.239173 | 0.259451 | 0.550436603  | 1                   |                   |                     |               |            |          |                                     |                                   |                      |
| Water_Extractives             | -0.82519 | 0.36582  | -0.75496 | -0.70216 | -0.72979 | -0.554077052 | -0.703204583        | 1                 |                     |               |            |          |                                     |                                   |                      |
| Ethanol_Extractives           | -0.10873 | -0.01162 | 0.029717 | -0.16009 | -0.08044 | 0.293949158  | 0.352004859         | -0.425664153      | 1                   |               |            |          |                                     |                                   |                      |
| Volatile_Loss                 | 0.689606 | -0.36904 | 0.551801 | 0.307722 | 0.262783 | 0.291395898  | 0.653001355         | -0.774200255      | 0.402946182         | 1             |            |          |                                     |                                   |                      |
| Residues                      | 0.899788 | -0.36164 | 0.805883 | 0.86839  | 0.892322 | 0.5394323    | 0.608427329         | -0.933820045      | 0.119615137         | 0.582860349   | 1          |          |                                     |                                   |                      |
| Protein                       | -0.81452 | 0.041975 | -0.75617 | -0.78665 | -0.77006 | -0.254488427 | -0.199813185        | 0.55114507        | 0.439523918         | -0.288207854  | -0.7662688 | 1        |                                     |                                   |                      |
| Aboveground Fresh Biomass (g) | 0.943649 | -0.23654 | 0.871033 | 0.800404 | 0.740402 | 0.190806139  | 0.334764491         | -0.720361941      | -0.216349945        | 0.614531723   | 0.81985397 | -0.89815 | 1                                   |                                   |                      |
| Aboveground Dry Biomass (g)   | 0.982312 | -0.45829 | 0.801542 | 0.855152 | 0.816865 | 0.335548031  | 0.538717119         | -0.850019053      | -0.032711667        | 0.683993209   | 0.90974431 | -0.75717 | 0.905450489                         | 1                                 |                      |
| Water_Biomass (%)             | -0.9233  | 0.519243 | -0.70019 | -0.81748 | -0.79333 | -0.350491614 | -0.594393711        | 0.819997953       | -0.001061885        | -0.616044106  | -0.8802014 | 0.649578 | -                                   | -                                 | 1                    |

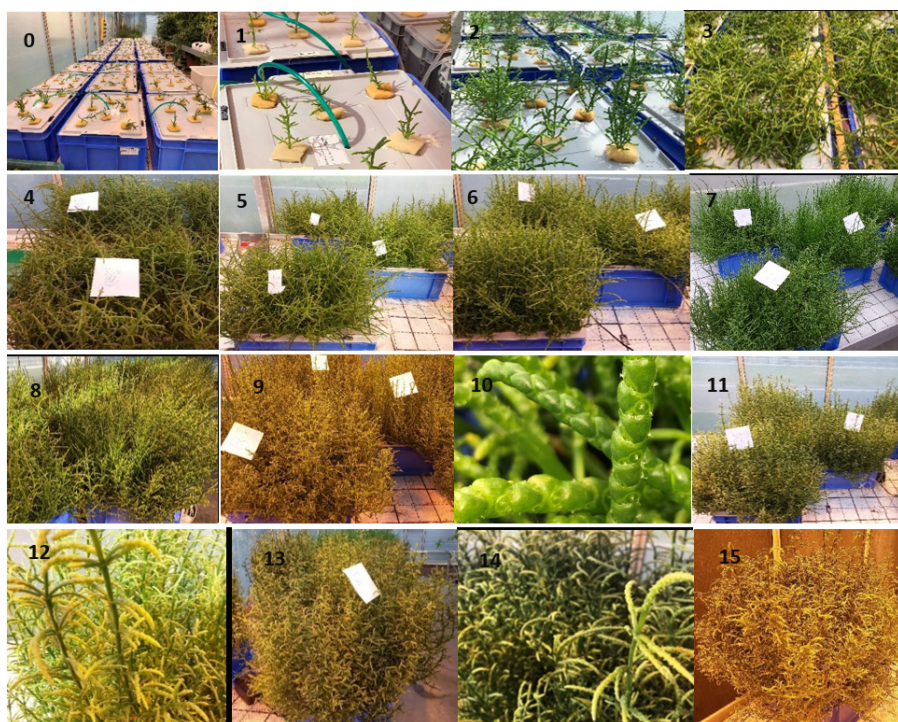

**Figure S1.** Growth and development of *Salicornia europaea* plants during 15 weeks after transplanting under hydroponic conditions. Numbers represent the number of weeks after transplanting.
